# Supplementary material
Source: PubMed Central journal article supplement (PMC3631337)
Supplement: supp_mct053_mct053supp.pdf [file supp_mct053_mct053supp.pdf]

## SUPPLEMENTARY DATA

TABLE S1. List of taxa with accession numbers obtained from GenBank.

| Taxa                               | <i>rbcL</i> | <i>trnT-F</i> | <i>rps16</i> | <i>atpB-rbcL</i> |
|------------------------------------|-------------|---------------|--------------|------------------|
| <i>Alberta minor</i>               | EU817410    | EU817452      | EF205637     | DQ131699         |
| <i>Anthospermum herbaceum</i>      | X83623      | EU145544      | EU145496     | AJ234028         |
| <i>Appunia guatemalensis</i>       | AJ288593    | AM945332      | --           | AJ234009         |
| <i>Caelospermum monticolum</i>     | AF331644    | AM945334      | AF001438     | AM945221         |
| <i>Calycophyllum candidissimum</i> | X83627      | DQ359164      | AF004030     | DQ131708         |
| <i>Captaincookia margaretae</i>    | EU817415    | EU817456      | EU817436     | --               |
| <i>Catesbaea spinosa</i>           | X83628      | AF152706      | AF004032     | --               |
| <i>Cephalanthus occidentalis</i>   | X83629      | AF152692      | AF004033     | DQ131710         |
| <i>Cinchona pubescens</i>          | X83630      | AY538451      | AF004035     | AJ233990         |
| <i>Coccocypselum condalia</i>      | AM117217    | EU145547      | EU145499     | EU145324         |
| <i>Condaminea corymbosa</i>        | Y18713      | AF102406      | AF004039     | --               |
| <i>Coussarea hydrangeifolia</i>    | EU145460    | EU145549      | EU145501     | EU145326         |
| <i>CreMASpora triflora</i>         | Z68856      | AF201040      | AF200990     | DQ131718         |
| <i>Cruckshanksia hymenodon</i>     | AJ288599    | EU145550      | EU145502     | AJ234004         |
| <i>Damnacanthus macrophyllus</i>   | AM945285    | AM945336      | AM945308     | AM945222         |
| <i>Danais xanthorrhoea</i>         | Z68794      | AM409329      | AM117297     | AJ234019         |
| <i>Declieuxia fruticosa</i>        | AJ002177    | EU145552      | EU145503     | DQ131721         |
| <i>Diplospora polysperma</i>       | AJ286703    | EU145538      | AM117301     | --               |
| <i>Doricera trilocularis</i>       | EU817417    | EU817457      | EU817437     | --               |
| <i>Emmenopterys henryi</i>         | Y18715      | AF152637      | AF242941     | DQ131728         |
| <i>Exostema spinosum</i>           | AY205350    | AY763830      | AF242947     | --               |
| <i>Faramea multiflora</i>          | Z68796      | AF102422      | AF004048     | EU145328         |
| <i>Ferdinandusa speciosa</i>       | Y18713      | EU145534      | AM117304     | DQ131735         |
| <i>Gaillonia olivieri</i>          | DQ662176    | DQ662142      | DQ662199     | --               |
| <i>Galium album</i>                | X81090      | GU357146      | AF004050     | X76459           |
| <i>Gelsemium sempervirens</i>      | L14397      | AM295096      | DQ660581     | AJ233985         |
| <i>Guettarda uruguensis</i>        | X83638      | EU145533      | EU145489     | DQ131739         |
| <i>Gynochthodes coriacea</i>       | AJ288603    | AJ847407      | AM117311     | AM945219         |
| <i>Hillia triflora</i>             | X83642      | AM117362      | AM117315     | AJ233993.2       |
| <i>Isertia coccinea</i>            | AY538489    | AY538455      | AY538430     | --               |
| <i>Ixora coccinea</i>              | X83646      | EU817464      | EF205641     | AM412400         |
| <i>Kelloggia galioides</i>         | DQ662179    | DQ662146      | DQ662203     | AY570767         |
| <i>Kraussia floribunda</i>         | Z68858      | AM117368      | AM117325     | DQ131746         |
| <i>Leptodermis potanini</i>        | DQ662180    | DQ662148      | DQ662204     | --               |
| <i>Luculia grandifolia</i>         | X83648      | DQ662149      | DQ662205     | AJ233986         |
| <i>Morinda citrifolia</i>          | AJ318448    | AF152616      | AJ320078     | --               |

|                                  |          |          |          |          |
|----------------------------------|----------|----------|----------|----------|
| <i>Morinda longiflora</i>        | --       | FJ906986 | GQ463275 | --       |
| <i>Morinda lucida</i>            | --       | FJ907010 | GQ463276 | DQ131753 |
| <i>Mussaenda erythrophylla</i>   | X83652   | EU145535 | EU145493 | DQ131754 |
| <i>Nauclea orientalis</i>        | AY538501 | AJ346958 | AJ320080 | EU145320 |
| <i>Ophiorrhiza mungos</i>        | FJ209082 | DQ662151 | AF004064 | FJ226541 |
| <i>Paederia bojeriana</i>        | DQ662181 | DQ662152 | DQ662206 | --       |
| <i>Paederia lanata</i>           | FN376317 | FN376333 | FN376325 | --       |
| <i>Paederia majungensis</i>      | DQ662184 | DQ662155 | DQ662209 | --       |
| <i>Paederia mandrarensis</i>     | DQ662185 | DQ662156 | DQ662210 | --       |
| <i>Paederia ntiti</i>            | FN376320 | FN376336 | FN376328 | --       |
| <i>Paederia pilifera</i>         | DQ662186 | DQ662157 | DQ662211 | --       |
| <i>Paederia pospischilii</i>     | DQ662187 | DQ662158 | DQ662212 | --       |
| <i>Pentas lanceolata</i>         | L13931   | AM266963 | AM266875 | AB247149 |
| <i>Putoria calabrica</i>         | AJ288620 | DQ662166 | AF004072 | X81672   |
| <i>Rondeletia odorata</i>        | Y11857   | AF152741 | EU145490 | EU145321 |
| <i>Rubia tinctorum</i>           | X83666   | FJ695421 | --       | X76465   |
| <i>Sabicea diversifolia</i>      | EU145459 | AJ847396 | EU145494 | DQ131781 |
| <i>Saprosma foetens</i>          | DQ662193 | DQ662168 | DQ662218 | FJ695386 |
| <i>Scyphiphora hydrophyllace</i> | EU817432 | EU817475 | DQ923045 | --       |
| <i>Serissa foetida</i>           | Z68822   | AF152618 | AF004081 | AJ234034 |
| <i>Spermadictyon suaveolens</i>  | Z68824   | DQ662171 | DQ662219 | --       |
| <i>Theligonum cynocrambe</i>     | X83668   | AF152621 | AF004087 | X81680   |
| <i>Uncaria rhynchophylla</i>     | X83669   | AJ346959 | AB178637 | --       |
| <i>Versteegia cauliflora</i>     | EU817433 | EU817476 | EU817451 | --       |
| <i>Xanthophytum borneense</i>    | EU145466 | EU145567 | EU145513 | EU145335 |

TABLE S2. Posterior age distributions of major nodes of *Paederia* based on different calibration protocols. Node numbers correlate with those in Fig. 2.

| Node                                      | Normal prior |               | Uniform prior |               | Exponential prior |               |
|-------------------------------------------|--------------|---------------|---------------|---------------|-------------------|---------------|
|                                           | Mean (Ma)    | 95% HPD (Ma)  | Mean (Ma)     | 95% HPD (Ma)  | Mean (Ma)         | 95% HPD (Ma)  |
| 1: <i>Paederia</i> stem                   | 30.73        | 22.84 – 39.67 | 32.39         | 23.51 – 41.42 | 31.37             | 22.7 – 40.02  |
| 2: <i>Paederia</i> crown                  | 24.21        | 16.41 – 32.5  | 25.52         | 17.26 – 34.51 | 24.58             | 16.79 – 33.55 |
| 3: <i>Paederia</i> clade I crown          | 15.92        | 5.11 – 26.21  | 17.07         | 5.71 – 28.43  | 16.32             | 5.65 – 27.0   |
| 4: Asian – African disjunction            | 15.99        | 10.28 – 22.68 | 16.85         | 10.8 – 24.11  | 16.27             | 10.87 – 23.58 |
| 5: <i>Paederia</i> clade II crown         | 8.68         | 4.59 – 14.43  | 9.44          | 4.93 – 15.34  | 9.06              | 4.86 – 14.85  |
| 6: African – Central American disjunction | 6.08         | 1.87 – 11.33  | 6.39          | 1.95 – 11.95  | 6.21              | 2.04 – 11.76  |
| 7: <i>Paederia</i> clade III crown        | 12.13        | 7.9 – 17.93   | 12.8          | 7.84 – 18.9   | 12.38             | 7.52 – 17.92  |
| 8: Asian – South American disjunction     | 10.01        | 5.57 – 15.47  | 10.53         | 5.55 – 16.47  | 10.13             | 5.5 – 15.72   |
